# Supplementary material for: Development of a Simple and Robust Whole Blood Assay with Dual Co-Stimulation to Quantify the Release of T-Cellular Signature Cytokines in Response to Aspergillus fumigatus Antigens
Source: MDPI journal article supplement (doi:10.3390/jof7060462), 2021-06-08
Supplement: s1 [file s1]

# **Development of a Simple and Robust Whole Blood Assay with Dual Co-Stimulation to Quantify the Release of T-Cellular Signature Cytokines in Response to *Aspergillus Fumigatus* Antigens**

Supplement

Table S1: Antibodies used for flow cytometric studies.

| Fluorochrome |         | Panels              |                     |                        |                     |
|--------------|---------|---------------------|---------------------|------------------------|---------------------|
|              |         | Cell populations    | T-cell activation   | Granulocyte activation | NK-cell activation  |
| VioBlue      | Marker  | CD3                 | CD3                 |                        |                     |
|              | Volume  | 2 µl                | 2 µl                |                        |                     |
|              | Company | Miltenyi Biotec     | Miltenyi Biotec     |                        |                     |
| FITC         | Marker  | CD66b               | CD4                 | CD66b                  | CD3                 |
|              | Volume  | 2 µl                | 2 µl                | 2 µl                   | 10 µl               |
|              | Company | Miltenyi Biotec     | Miltenyi Biotec     | Miltenyi Biotec        | BD                  |
| PE           | Marker  |                     | IFN-γ               | CD62L                  | IFN-γ               |
|              | Volume  |                     | 2 µl                | 2 µl                   | 2 µl                |
|              | Company |                     | Miltenyi Biotec     | Miltenyi Biotec        | Miltenyi Biotec     |
| PE-Vio615    | Marker  |                     | CD69                |                        | CD69                |
|              | Volume  |                     | 2 µl                |                        | 2 µl                |
|              | Company |                     | Miltenyi Biotec     |                        | Miltenyi Biotec     |
| PerCP        | Marker  | CD14                | CD8                 |                        | CD16                |
|              | Volume  | 2 µl                | 2 µl                |                        | 5 µl                |
|              | Company | Miltenyi Biotec     | Miltenyi Biotec     |                        | Biologend           |
| PE-Vio770    | Marker  |                     | CD107a              |                        | CD107a              |
|              | Volume  |                     | 10 µl               |                        | 10 µl               |
|              | Company |                     | Miltenyi Biotec     |                        | Miltenyi Biotec     |
| APC          | Marker  | CD56                | CD154               | CD11b                  | CD56                |
|              | Volume  | 5 µl                | 2 µl                | 2 µl                   | 5 µl                |
|              | Company | BD                  | Miltenyi Biotec     | Miltenyi Biotec        | BD                  |
| APC-Vio750   | Marker  | L/D fixable near-IR | L/D fixable near-IR | L/D fixable near-IR    | L/D fixable near-IR |
|              | Volume  | 0.1 µl              | 0.1 µl              | 0.1 µl                 | 0.1 µl              |
|              | Company | Invitrogen          | Invitrogen          | Invitrogen             | Invitrogen          |

Added directly to WB stimulation tubes as described in Materials & Methods (section 2.7)

Life/Dead staining (L/D) performed before extracellular staining in 1 ml Hank's balanced salt solution for 30 min

Extracellular staining

Intracellular staining

Abbreviations: APC = allophycocyanin, FITC = fluorescein isothiocyanate, IR = infra red, PE = phycoerythrin, PerCP = Peridinin-Chlorophyll-Protein.

**Table S2: Raw data for AfuLy-induced cytokine release (in pg/ml) in samples from patients with *Aspergillus*-associated lung pathologies and other chronic lung diseases.**

| Patient →      | Control | Control | Control | Control | Control | CF      | CF      | ABPA    | ABPA    | ABPA    | CPA      | CPA    | CPA     | CPA     | Median   | Median       |       |
|----------------|---------|---------|---------|---------|---------|---------|---------|---------|---------|---------|----------|--------|---------|---------|----------|--------------|-------|
| Cytokine       | #1      | #2      | #3      | #4      | #5      | #1      | #2      | #1      | #2      | #3      | #1       | #2     | #3      | #4      | Controls | Asp-ass Dis. | MMR   |
| IFN- $\gamma$  | 0.0     | 0.0     | 0.0     | 23.2    | 5.5     | 28.9    | 16.7    | 6.4     | 6.0     | 0.6     | 29.0     | 3.8    | 23.9    | 10.0    | 0.0      | 10.0         | INF   |
| IL-2           | 0.0     | 0.4     | 0.0     | 136.2   | 1.0     | 46.4    | 4.8     | 0.8     | 4.2     | 36.1    | 46.1     | 41.7   | 312.6   | 4.0     | 0.4      | 36.1         | 85.9  |
| IL-4           | 0.0     | 0.0     | 0.0     | 0.0     | 0.0     | 36.5    | 4.5     | 7.3     | 0.0     | 2.7     | 19.0     | 2.7    | 11.7    | 2.7     | 0.0      | 4.5          | INF   |
| IL-5           | 0.0     | 0.0     | 0.6     | 5.0     | 0.7     | 22.6    | 4.5     | 3.6     | 1.4     | 4.3     | 22.2     | 0.9    | 22.6    | 1.9     | 0.6      | 4.3          | 7.1   |
| IL-10          | 0.0     | 0.0     | 0.0     | 292.6   | 0.0     | 185.5   | 70.4    | 0.0     | 20.3    | 72.8    | 1886.9   | 10.8   | 18.7    | 32.4    | 0.0      | 32.4         | INF   |
| IL-13          | 0.5     | 0.0     | 0.0     | 39.3    | 0.0     | 27.4    | 8.7     | 0.0     | 0.0     | 2.8     | 33.5     | 2.2    | 34.8    | 3.9     | 0.0      | 3.9          | INF   |
| IL-17A         | 0.0     | 0.0     | 1.3     | 48.3    | 6.2     | 28.7    | 21.6    | 8.2     | 10.1    | 5.5     | 24.1     | 4.1    | 17.1    | 14.2    | 1.3      | 14.2         | 10.9  |
| TNF- $\alpha$  | 2.1     | 0.0     | 0.0     | 2339.4  | 0.0     | 561.2   | 3324.0  | 0.0     | 1422.2  | 158.8   | 15241.4  | 5.4    | 721.4   | 640.6   | 0.0      | 640.6        | INF   |
| MIP-1 $\alpha$ | 8.6     | 0.0     | 11.6    | 97207.3 | 459.9   | 8137.0  | 28744.2 | 45.3    | 3169.3  | 1483.2  | 97207.3  | 171.5  | 97191.7 | 1290.6  | 11.6     | 3169.3       | 273.0 |
| MIP-1 $\beta$  | 0.0     | 0.0     | 0.0     | 1593.4  | 0.0     | 622.8   | 1026.9  | 0.0     | 412.5   | 415.7   | 23121.0  | 175.7  | 2867.8  | 587.1   | 0.0      | 587.1        | INF   |
| MIP-3 $\alpha$ | 0.0     | 0.0     | 190.2   | 14286.5 | 1939.0  | 3459.0  | 12636.9 | 21.0    | 10155.0 | 9671.1  | 161434.3 | 256.4  | 3322.4  | 5507.9  | 190.2    | 5507.9       | 29.0  |
| IL-1 $\beta$   | 0.0     | 0.0     | 0.0     | 649.7   | 4.6     | 0.0     | 7716.3  | 0.0     | 1527.9  | 85.9    | 53147.3  | 0.0    | 209.8   | 1070.2  | 0.0      | 209.8        | INF   |
| IL-6           | 0.0     | 0.0     | 0.0     | 25229.5 | 8.2     | 4647.9  | 2684.6  | 2.2     | 3077.8  | 3247.5  | 26841.8  | 7.0    | 11703.5 | 2294.6  | 0.0      | 3077.8       | INF   |
| IL-7           | 0.0     | 5.3     | 0.0     | 30.1    | 0.0     | 56.4    | 15.0    | 0.0     | 0.0     | 11.8    | 61.1     | 9.7    | 26.0    | 0.0     | 0.0      | 11.8         | INF   |
| IL-8           | 0.0     | 11402.0 | 52040.8 | 75918.0 | 77693.0 | 36622.0 | 96147.0 | 13346.0 | 57674.0 | 46756.0 | 89414.0  | 7642.5 | 98065.9 | 42691.6 | 52040.8  | 46756.0      | 0.9   |
| IL-12p70       | 0.0     | 0.0     | 0.0     | 2.3     | 0.0     | 9.1     | 0.0     | 0.0     | 0.0     | 0.0     | 4.3      | 0.0    | 0.0     | 1.5     | 0.0      | 0.0          | ND    |
| IL-21          | 0.0     | 0.0     | 0.0     | 126.7   | 0.0     | 129.8   | 89.5    | 0.0     | 17.0    | 58.3    | 179.1    | 0.0    | 128.8   | 38.8    | 0.0      | 58.3         | INF   |
| IL-23          | 0.0     | 0.0     | 36.7    | 146.6   | 0.0     | 527.4   | 180.9   | 0.0     | 0.0     | 37.1    | 253.4    | 0.0    | 169.6   | 104.0   | 0.0      | 104.0        | INF   |
| GM-CSF         | 0.0     | 0.0     | 15.3    | 463.4   | 20.2    | 167.0   | 126.6   | 13.6    | 85.7    | 53.5    | 1204.5   | 27.1   | 251.0   | 42.8    | 15.3     | 85.7         | 5.6   |
| Fractalkine    | 0.0     | 0.0     | 0.0     | 0.0     | 0.0     | 356.5   | 0.0     | 0.0     | 0.0     | 0.0     | 2.8      | 0.0    | 146.6   | 96.5    | 0.0      | 0.0          | ND    |
| ITAC           | 116.0   | 162.7   | 199.0   | 347.0   | 205.0   | 396.3   | 531.6   | 136.0   | 187.0   | 208.7   | 174.6    | 530.7  | 324.2   | 123.0   | 199.0    | 208.7        | 1.0   |

Abbreviations: ABPA = allergic bronchopulmonary aspergillosis, AfuLy = *A. fumigatus* mycelial lysate, Asp-ass. Dis. = *Aspergillus*-associated diseases, CF = cystic fibrosis, CPA = chronic pulmonary aspergillosis, INF = infinite (0 pg/ml in the control cohort), MMR = median-to-median ratio, ND = not defined (0 pg/ml in both cohorts).

**Table S3: Raw data for Asp4-induced cytokine release (in pg/ml) in samples from patients with *Aspergillus*-associated lung pathologies and other chronic lung diseases.**

| Patient →      | Control | Control | Control | Control | Control | CF      | CF      | ABPA    | ABPA    | ABPA   | CPA      | CPA   | CPA     | CPA     | Median   | Median       | MMR |
|----------------|---------|---------|---------|---------|---------|---------|---------|---------|---------|--------|----------|-------|---------|---------|----------|--------------|-----|
| Cytokine       | #1      | #2      | #3      | #4      | #5      | #1      | #2      | #1      | #2      | #3     | #1       | #2    | #3      | #4      | Controls | Asp-ass Dis. |     |
| IFN- $\gamma$  | 17.9    | 16.8    | 11.7    | 15.0    | 19.1    | 70.2    | 8.2     | 22.7    | 11.3    | 0.0    | 74.9     | 2.0   | 8.2     | 27.1    | 16.8     | 11.3         | 0.7 |
| IL-2           | 7.9     | 5.8     | 1.5     | 0.6     | 8.5     | 17.1    | 8.5     | 9.6     | 12.5    | 3.5    | 11.0     | 0.2   | 4.2     | 6.0     | 5.8      | 8.5          | 1.5 |
| IL-4           | 3.6     | 7.3     | 0.0     | 0.0     | 3.6     | 21.8    | 2.7     | 22.0    | 10.9    | 0.0    | 0.0      | 0.0   | 0.0     | 2.7     | 3.6      | 2.7          | 0.7 |
| IL-5           | 5.5     | 4.8     | 1.2     | 6.3     | 8.6     | 21.8    | 3.1     | 10.3    | 8.8     | 0.1    | 11.3     | 1.2   | 2.4     | 4.6     | 5.5      | 4.6          | 0.8 |
| IL-10          | 83.8    | 140.9   | 165.1   | 183.7   | 131.1   | 1244.0  | 871.9   | 127.1   | 631.8   | 125.5  | 16510.9  | 0.0   | 16.0    | 1205.6  | 140.9    | 631.8        | 4.5 |
| IL-13          | 5.8     | 5.1     | 1.7     | 2.2     | 8.8     | 18.3    | 7.7     | 7.8     | 10.9    | 0.0    | 13.8     | 0.0   | 7.0     | 9.8     | 5.1      | 7.8          | 1.5 |
| IL-17A         | 20.1    | 17.4    | 1.3     | 1.3     | 16.3    | 31.2    | 24.6    | 20.2    | 21.5    | 0.0    | 32.6     | 0.0   | 7.5     | 18.8    | 16.3     | 20.2         | 1.2 |
| TNF- $\alpha$  | 3821.2  | 1588.2  | 1549.4  | 458.8   | 5855.0  | 4319.2  | 1358.0  | 733.5   | 2317.2  | 172.1  | 6855.4   | 5.8   | 1349.4  | 3030.4  | 1588.2   | 1358.0       | 0.9 |
| MIP-1 $\alpha$ | 16981.2 | 917.1   | 4956.8  | 29011.3 | 21490.8 | 17247.0 | 23817.2 | 5772.5  | 3619.3  | 2302.2 | 97207.3  | 192.1 | 97191.7 | 8383.6  | 16981.2  | 8383.6       | 0.5 |
| MIP-1 $\beta$  | 3165.2  | 233.1   | 11608.6 | 1901.4  | 4591.6  | 1482.8  | 4757.9  | 4294.9  | 1008.3  | 3069.1 | 23121.0  | 377.3 | 7902.8  | 4026.1  | 3165.2   | 4026.1       | 1.3 |
| MIP-3 $\alpha$ | 2732.5  | 0.0     | 2008.1  | 1435.5  | 6138.0  | 1963.0  | 11105.9 | 2249.3  | 5514.0  | 4790.1 | 51071.3  | 448.4 | 1423.4  | 4409.9  | 2008.1   | 4409.9       | 2.2 |
| IL-1 $\beta$   | 2346.7  | 544.3   | 873.1   | 2833.3  | 4274.9  | 3334.8  | 805.8   | 1786.8  | 1531.9  | 189.3  | 30955.3  | 6.0   | 2881.3  | 3316.2  | 2346.7   | 1786.8       | 0.8 |
| IL-6           | 7674.8  | 1403.3  | 4808.5  | 23183.5 | 8457.1  | 11960.9 | 4989.6  | 5462.0  | 14414.8 | 2043.5 | 26208.8  | 88.3  | 15881.5 | 12362.6 | 7674.8   | 11960.9      | 1.6 |
| IL-7           | 12.7    | 3.9     | 1.4     | NA      | 57.1    | 28.0    | 0.0     | 0.0     | 62.1    | 11.4   | 57.3     | 0.0   | 36.3    | 0.0     | 8.3      | 11.4         | 1.4 |
| IL-8           | 22731.0 | 624.0   | 7935.8  | 24880.0 | 57937.0 | 28772.0 | 48113.0 | 17375.0 | 44006.0 | 8148.0 | 101520.0 | 289.5 | 74112.9 | 19525.6 | 22731.0  | 28772.0      | 1.3 |
| IL-12p70       | 14.0    | 2.2     | 0.0     | 5.5     | 16.2    | 25.0    | 0.0     | 5.5     | 7.2     | 0.0    | 6.7      | 0.0   | 2.3     | 8.5     | 5.5      | 5.5          | 1.0 |
| IL-21          | 34.2    | 44.0    | 35.9    | 81.0    | 65.5    | 97.1    | 49.5    | 0.0     | 136.5   | 19.6   | 172.8    | 0.0   | 133.6   | 66.2    | 44.0     | 66.2         | 1.5 |
| IL-23          | 141.6   | 351.2   | 109.5   | 468.4   | 883.0   | 789.4   | 127.0   | 353.7   | 300.1   | 37.1   | 360.4    | 0.0   | 527.7   | 157.0   | 351.2    | 300.1        | 0.9 |
| GM-CSF         | 79.9    | 85.4    | 53.5    | 168.5   | 137.8   | 311.1   | 87.6    | 159.4   | 184.0   | 33.4   | 759.2    | 0.0   | 204.6   | 97.6    | 85.4     | 159.4        | 1.9 |
| Fractalkine    | 0.0     | 167.5   | 0.0     | 0.0     | 174.2   | 253.6   | 0.0     | 0.0     | 155.4   | 0.0    | 0.0      | 0.0   | 0.0     | 112.3   | 0.0      | 0.0          | ND  |
| ITAC           | 254.0   | 24.6    | 6.0     | 147.0   | 327.0   | 306.8   | 186.6   | 155.7   | 188.0   | 9.5    | 101.6    | 155.7 | 20.6    | 10.9    | 147.0    | 155.7        | 1.1 |

Abbreviations: ABPA = allergic bronchopulmonary aspergillosis, AfuLy = *A. fumigatus* mycelial lysate, Asp-ass. Dis. = *Aspergillus*-associated diseases, CF = cystic fibrosis, CPA = chronic pulmonary aspergillosis, INF = infinite (0 pg/ml in the control cohort), MMR = median-to-median ratio, NA = not available (invalid measurement), ND = not defined (0 pg/ml in both cohorts).
